# Supplementary material for: Deleterious mitochondrial DNA point mutations are overrepresented in Drosophila expressing a proofreading-defective DNA polymerase γ
Source: PubMed Central journal article supplement (PMC6289449; doi:10.1371/journal.pgen.1007805), 2018-11-19

### Cross #1: Generation of Control Fly

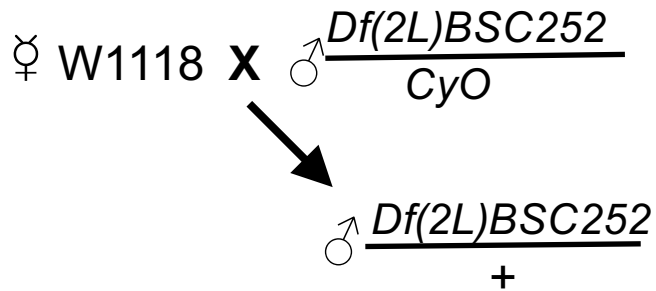

### Cross #2: Generation of 1xPolG<sup>mut</sup>

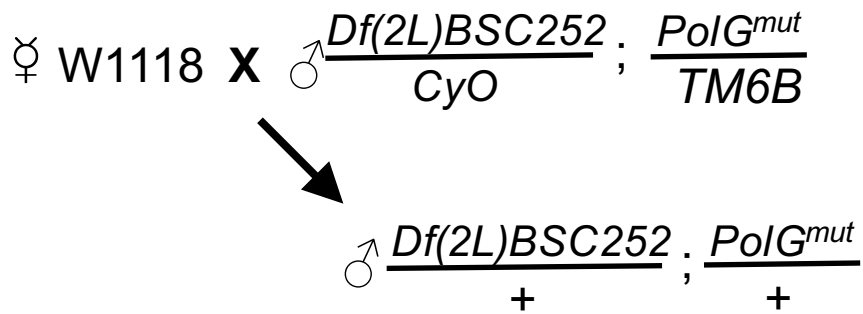

### Cross #3: Generation of 2xPolG<sup>mut</sup>

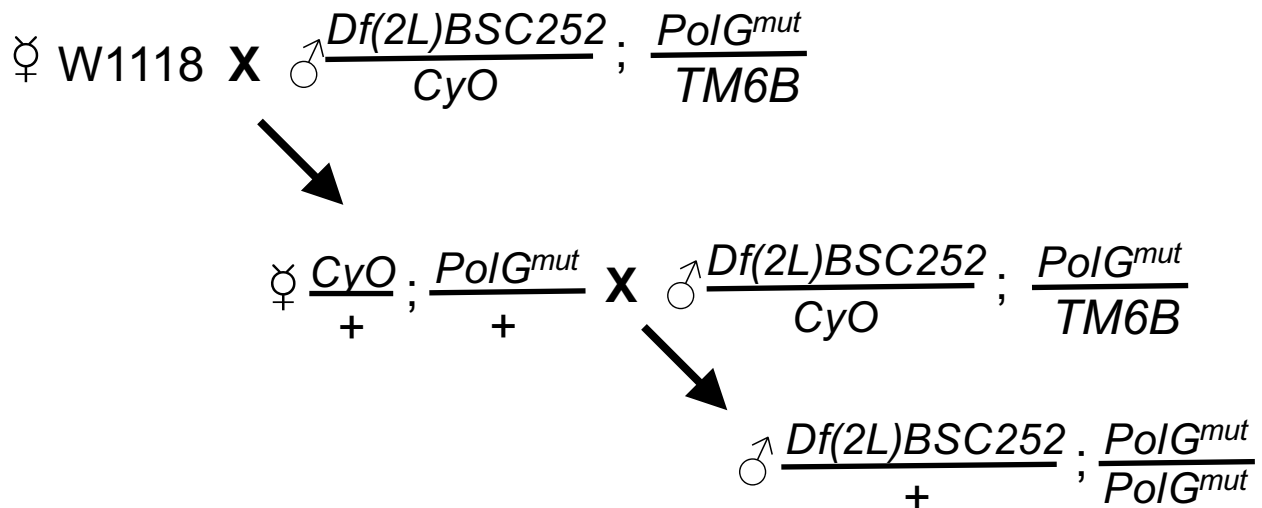

Supplement: pgen.1007805.s001.pdf [file pgen.1007805.s001.pdf]
