# Supplementary material for: Deleterious mitochondrial DNA point mutations are overrepresented in Drosophila expressing a proofreading-defective DNA polymerase γ
Source: PubMed Central journal article supplement (PMC6289449; doi:10.1371/journal.pgen.1007805), 2018-11-19

**A**

## Insertions

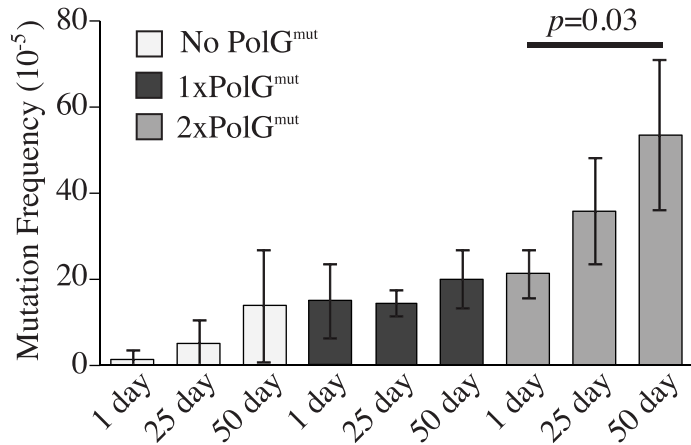**B**

## Deletions

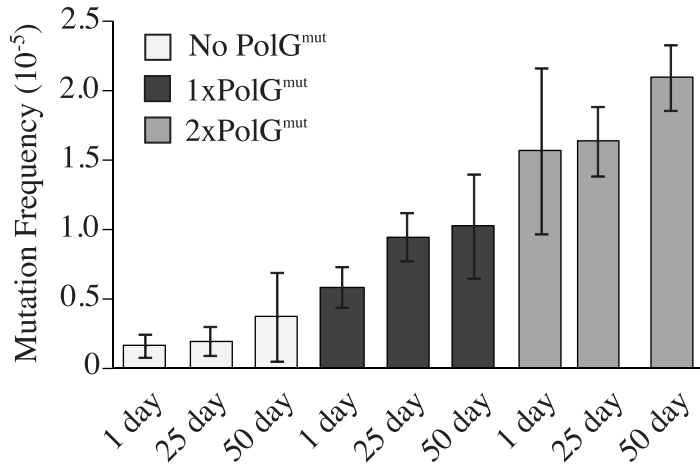

Supplement: pgen.1007805.s004.pdf [file pgen.1007805.s004.pdf]
