# Supplementary material for: Deleterious mitochondrial DNA point mutations are overrepresented in Drosophila expressing a proofreading-defective DNA polymerase γ
Source: PubMed Central journal article supplement (PMC6289449; doi:10.1371/journal.pgen.1007805), 2018-11-19

**A** $0xPolG^{mut}$ 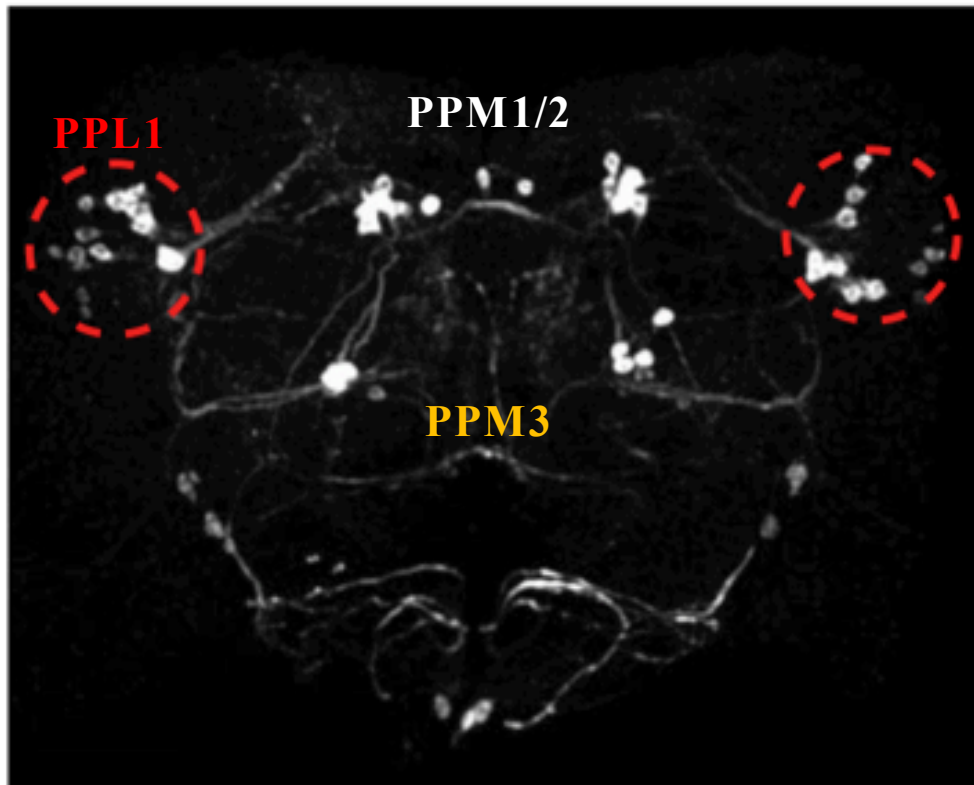**B** $2xPolG^{mut}$ 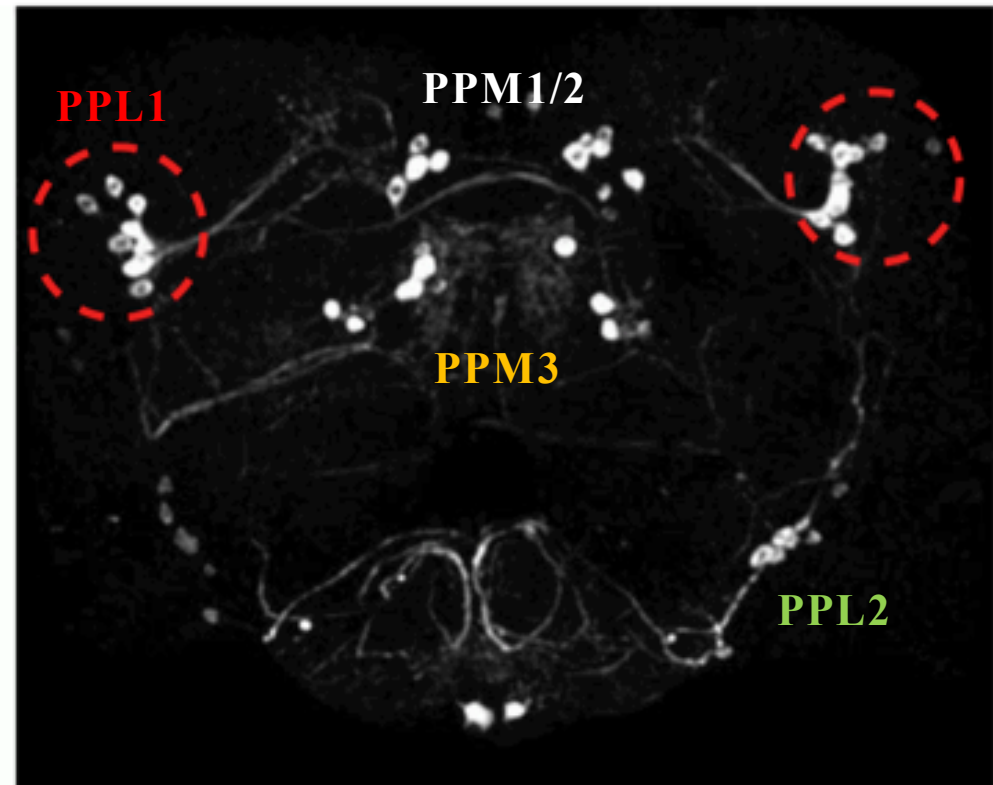

Supplement: pgen.1007805.s005.pdf [file pgen.1007805.s005.pdf]
