# Supplementary material for: Deleterious mitochondrial DNA point mutations are overrepresented in Drosophila expressing a proofreading-defective DNA polymerase γ
Source: PubMed Central journal article supplement (PMC6289449; doi:10.1371/journal.pgen.1007805), 2018-11-19

A

0xPolg<sup>mut</sup>

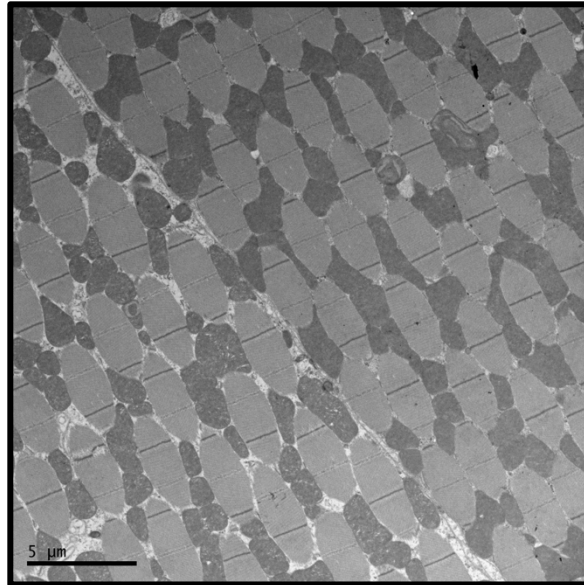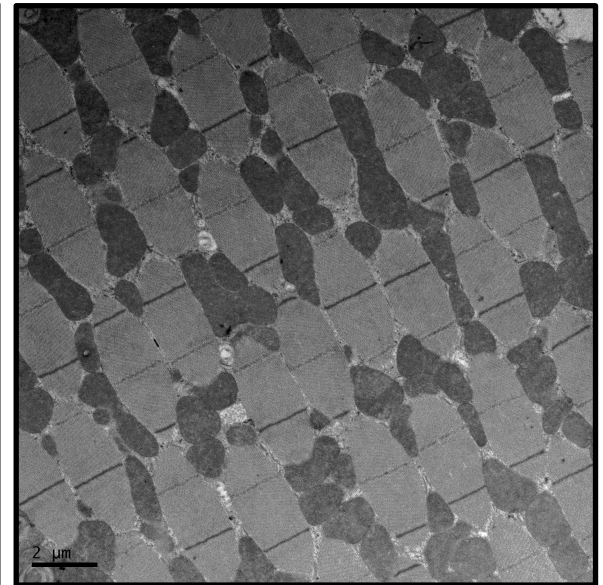

B

2xPolg<sup>mut</sup>

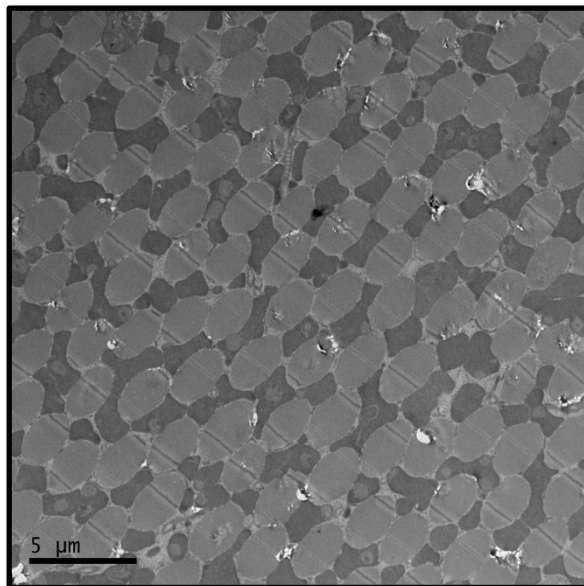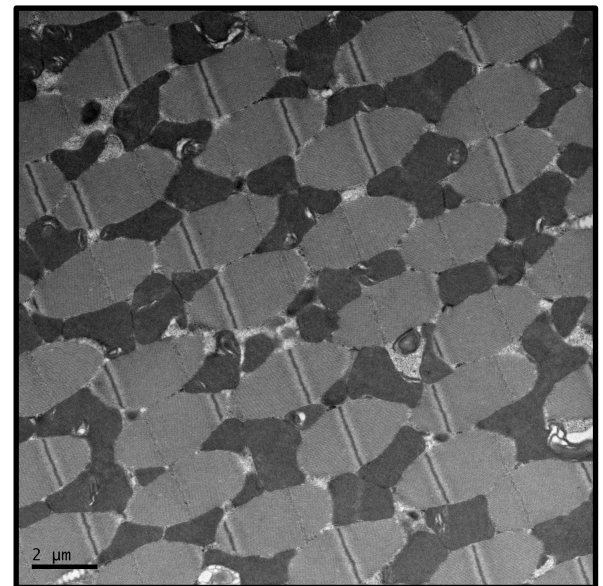

Supplement: pgen.1007805.s007.pdf [file pgen.1007805.s007.pdf]
