# Supplementary material for: Deleterious mitochondrial DNA point mutations are overrepresented in Drosophila expressing a proofreading-defective DNA polymerase γ
Source: PubMed Central journal article supplement (PMC6289449; doi:10.1371/journal.pgen.1007805), 2018-11-19
Supplement: pgen.1007805.s014.pdf [file pgen.1007805.s014.pdf]

| <b>Gene name/identifier</b>                          | <b>Biological function</b>          |
|------------------------------------------------------|-------------------------------------|
| CAH1 (carbonic anhydrase 1)                          | pH regulation                       |
| Adat1 (Adenosine deaminase-tRNA specific 1)          | tRNA modifying enzyme               |
| CG16865                                              | Presumed spliceosome component      |
| CG16888                                              | unknown                             |
| Sos (son of sevenless)                               | guanine nucleotide exchange factor  |
| B (black)                                            | aspartate decarboxylase             |
| tamas (PolG)                                         | mitochondrial DNA replication       |
| Arpc1 (Actin-related protein 2/3 complex, subunit 1) | regulator of F-actin polymerization |
| Orc5 (Origin recognition complex subunit 5)          | DNA replication                     |
| GatC (Glutamyl-tRNA amidotransferase, subunit C)     | mitochondrial translation           |
| DNApol-gamma35 (DNA polymerase gamma 35kD)           | mitochondrial DNA replication       |
| Rpl133 (RNA polymerase II 33kD subunit)              | transcription                       |
| mRpS23 (mitochondrial ribosomal protein S23)         | translation                         |
| CenG1A (Centaurin gamma 1A)                          | unknown                             |
| CG33307                                              | unknown                             |
| CG33306                                              | unknown                             |
| CG8997                                               | unknown                             |
| CG7916                                               | unknown                             |
| CG7953                                               | unknown                             |
| CG7968                                               | unknown                             |
