# Supplementary material for: Deleterious mitochondrial DNA point mutations are overrepresented in Drosophila expressing a proofreading-defective DNA polymerase γ
Source: PLoS Genet. 2018 Nov 19;14(11):e1007805. doi: 10.1371/journal.pgen.1007805 (PMC6289449; doi:10.1371/journal.pgen.1007805)
Supplement: S1 Table — The total number of nucleotides sequenced, mutations identified, and genome-wide mutation frequency are shown for each fly for (A) uniquely mutated sites, and (B) total mutations. These sequencing data represent nucleotides for which sequence reads could be mapped to the Drosophila mtDNA reference sequence and duplex consensus strands could be constructed. (PDF) [file pgen.1007805.s012.pdf]

| 1-day-old Flies              |                       |                     |                       | 25-day-old Flies        |                       |                     |                       | 50-day-old Flies        |                       |                     |                        |
|------------------------------|-----------------------|---------------------|-----------------------|-------------------------|-----------------------|---------------------|-----------------------|-------------------------|-----------------------|---------------------|------------------------|
| Fly genotype                 | Nucleotides Sequenced | Number of Mutations | Mutation Frequency    | Fly Genotype            | Nucleotides Sequenced | Number of Mutations | Mutation Frequency    | Fly Genotype            | Nucleotides Sequenced | Number of Mutations | Mutation Frequency     |
| 0xPolG <sup>mut</sup> 1      | 42518691              | 90                  | 2.12x10 <sup>-6</sup> | 0xPolG <sup>mut</sup> 1 | 5406269               | 10                  | 1.85x10 <sup>-6</sup> | 0xPolG <sup>mut</sup> 1 | 5679645               | 13                  | 2.29x10 <sup>-6</sup>  |
| 0xPolG <sup>mut</sup> 2      | 8199467               | 33                  | 4.02x10 <sup>-6</sup> | 0xPolG <sup>mut</sup> 2 | 19092032              | 123                 | 6.44x10 <sup>-6</sup> | 0xPolG <sup>mut</sup> 2 | 2215855               | 8                   | 3.61x10 <sup>-6</sup>  |
| 0xPolG <sup>mut</sup> 3      | 9037683               | 27                  | 2.99x10 <sup>-6</sup> | 0xPolG <sup>mut</sup> 3 | 2661304               | 6                   | 2.25x10 <sup>-6</sup> | 0xPolG <sup>mut</sup> 3 | 9677840               | 7                   | 7.23x10 <sup>-7</sup>  |
| 0xPolG <sup>mut</sup> 4      | 6147590               | 27                  | 4.39x10 <sup>-6</sup> | 0xPolG <sup>mut</sup> 4 | 11853341              | 12                  | 1.01x10 <sup>-6</sup> | 0xPolG <sup>mut</sup> 4 | 9506293               | 16                  | 1.68x10 <sup>-6</sup>  |
| 0xPolG <sup>mut</sup> 5      | 6741158               | 23                  | 3.41x10 <sup>-6</sup> | 0xPolG <sup>mut</sup> 5 | 4407413               | 16                  | 3.63x10 <sup>-6</sup> | 0xPolG <sup>mut</sup> 5 | 3364513               | 0                   | <2.97x10 <sup>-7</sup> |
| 1xPolG <sup>mut</sup> 1      | 8070242               | 226                 | 2.80x10 <sup>-5</sup> | 1xPolG <sup>mut</sup> 1 | 2450795               | 86                  | 3.51x10 <sup>-5</sup> | 1xPolG <sup>mut</sup> 1 | 8110386               | 243                 | 3.00x10 <sup>-5</sup>  |
| 1xPolG <sup>mut</sup> 2      | 6288317               | 181                 | 2.88x10 <sup>-5</sup> | 1xPolG <sup>mut</sup> 2 | 1542728               | 46                  | 2.98x10 <sup>-5</sup> | 1xPolG <sup>mut</sup> 2 | 9385321               | 343                 | 3.65x10 <sup>-5</sup>  |
| 1xPolG <sup>mut</sup> 3      | 4066001               | 137                 | 3.37x10 <sup>-5</sup> | 1xPolG <sup>mut</sup> 3 | 2015717               | 61                  | 3.03x10 <sup>-5</sup> | 1xPolG <sup>mut</sup> 3 | 1788143               | 45                  | 2.52x10 <sup>-5</sup>  |
| 1xPolG <sup>mut</sup> 4      | 14242560              | 372                 | 2.61x10 <sup>-5</sup> | 1xPolG <sup>mut</sup> 4 | 3447601               | 107                 | 3.10x10 <sup>-5</sup> | 1xPolG <sup>mut</sup> 4 | 1204779               | 38                  | 3.15x10 <sup>-5</sup>  |
| 1xPolG <sup>mut</sup> 5      | 24762695              | 613                 | 2.48x10 <sup>-5</sup> | 1xPolG <sup>mut</sup> 5 | 2938793               | 98                  | 3.33x10 <sup>-5</sup> | 1xPolG <sup>mut</sup> 5 | 3081790               | 112                 | 3.63x10 <sup>-5</sup>  |
| 1xPolG <sup>mut-Chr2</sup> 1 | 52868988              | 1186                | 2.24x10 <sup>-5</sup> | 2xPolG <sup>mut</sup> 1 | 5462486               | 404                 | 7.40x10 <sup>-5</sup> | 2xPolG <sup>mut</sup> 1 | 2422131               | 242                 | 9.99x10 <sup>-5</sup>  |
| 1xPolG <sup>mut-Chr2</sup> 2 | 65209719              | 1526                | 2.34x10 <sup>-5</sup> | 2xPolG <sup>mut</sup> 2 | 6547279               | 517                 | 7.90x10 <sup>-5</sup> | 2xPolG <sup>mut</sup> 2 | 1896758               | 188                 | 9.91x10 <sup>-5</sup>  |
| 1xPolG <sup>mut-Chr2</sup> 3 | 70944805              | 1480                | 2.09x10 <sup>-5</sup> | 2xPolG <sup>mut</sup> 3 | 4274349               | 333                 | 7.79x10 <sup>-5</sup> | 2xPolG <sup>mut</sup> 3 | 3432156               | 375                 | 1.09x10 <sup>-4</sup>  |
| 1xPolG <sup>mut-Chr2</sup> 4 | 74409046              | 1688                | 2.27x10 <sup>-5</sup> | 2xPolG <sup>mut</sup> 4 | 7056676               | 553                 | 7.84x10 <sup>-5</sup> | 2xPolG <sup>mut</sup> 4 | 6967151               | 594                 | 8.53x10 <sup>-5</sup>  |
| 2xPolG <sup>mut</sup> 1      | 14409626              | 967                 | 6.71x10 <sup>-5</sup> | 2xPolG <sup>mut</sup> 5 | 7133239               | 505                 | 7.08x10 <sup>-5</sup> | 2xPolG <sup>mut</sup> 5 | 5222775               | 430                 | 8.23x10 <sup>-5</sup>  |
| 2xPolG <sup>mut</sup> 2      | 1951359               | 159                 | 8.15x10 <sup>-5</sup> |                         |                       |                     |                       |                         |                       |                     |                        |
| 2xPolG <sup>mut</sup> 3      | 14911301              | 951                 | 6.38x10 <sup>-5</sup> |                         |                       |                     |                       |                         |                       |                     |                        |
| 2xPolG <sup>mut</sup> 4      | 10731036              | 675                 | 6.29x10 <sup>-5</sup> |                         |                       |                     |                       |                         |                       |                     |                        |

| 1-day-old Flies              |                       |                     |                       | 25-day-old Flies        |                       |                     |                       | 50-day-old Flies        |                       |                     |                        |
|------------------------------|-----------------------|---------------------|-----------------------|-------------------------|-----------------------|---------------------|-----------------------|-------------------------|-----------------------|---------------------|------------------------|
| Fly genotype                 | Nucleotides Sequenced | Number of Mutations | Mutation Frequency    | Fly Genotype            | Nucleotides Sequenced | Number of Mutations | Mutation Frequency    | Fly Genotype            | Nucleotides Sequenced | Number of Mutations | Mutation Frequency     |
| 0xPolG <sup>mut</sup> 1      | 42518691              | 111                 | 2.61x10 <sup>-6</sup> | 0xPolG <sup>mut</sup> 1 | 5406269               | 33                  | 6.10x10 <sup>-6</sup> | 0xPolG <sup>mut</sup> 1 | 5679645               | 13                  | 2.29x10 <sup>-6</sup>  |
| 0xPolG <sup>mut</sup> 2      | 8199467               | 35                  | 4.27x10 <sup>-6</sup> | 0xPolG <sup>mut</sup> 2 | 19092032              | 222                 | 1.16x10 <sup>-5</sup> | 0xPolG <sup>mut</sup> 2 | 2215855               | 8                   | 3.61x10 <sup>-6</sup>  |
| 0xPolG <sup>mut</sup> 3      | 9037683               | 43                  | 4.76x10 <sup>-6</sup> | 0xPolG <sup>mut</sup> 3 | 2661304               | 7                   | 2.63x10 <sup>-6</sup> | 0xPolG <sup>mut</sup> 3 | 9677840               | 11                  | 1.14x10 <sup>-6</sup>  |
| 0xPolG <sup>mut</sup> 4      | 6147590               | 27                  | 4.39x10 <sup>-6</sup> | 0xPolG <sup>mut</sup> 4 | 11853341              | 32                  | 2.70x10 <sup>-6</sup> | 0xPolG <sup>mut</sup> 4 | 9506293               | 147                 | 1.55x10 <sup>-5</sup>  |
| 0xPolG <sup>mut</sup> 5      | 6741158               | 51                  | 7.57x10 <sup>-6</sup> | 0xPolG <sup>mut</sup> 5 | 4407413               | 35                  | 7.94x10 <sup>-6</sup> | 0xPolG <sup>mut</sup> 5 | 3364513               | 0                   | <2.97x10 <sup>-7</sup> |
| 1xPolG <sup>mut</sup> 1      | 8070242               | 240                 | 2.97x10 <sup>-5</sup> | 1xPolG <sup>mut</sup> 1 | 2450795               | 89                  | 3.63x10 <sup>-5</sup> | 1xPolG <sup>mut</sup> 1 | 8110386               | 255                 | 3.14x10 <sup>-5</sup>  |
| 1xPolG <sup>mut</sup> 2      | 6288317               | 192                 | 3.05x10 <sup>-5</sup> | 1xPolG <sup>mut</sup> 2 | 1542728               | 46                  | 2.98x10 <sup>-5</sup> | 1xPolG <sup>mut</sup> 2 | 9385321               | 383                 | 4.08x10 <sup>-5</sup>  |
| 1xPolG <sup>mut</sup> 3      | 4066001               | 138                 | 3.39x10 <sup>-5</sup> | 1xPolG <sup>mut</sup> 3 | 2015717               | 62                  | 3.08x10 <sup>-5</sup> | 1xPolG <sup>mut</sup> 3 | 1788143               | 45                  | 2.52x10 <sup>-5</sup>  |
| 1xPolG <sup>mut</sup> 4      | 14242560              | 398                 | 2.79x10 <sup>-5</sup> | 1xPolG <sup>mut</sup> 4 | 3447601               | 134                 | 3.89x10 <sup>-5</sup> | 1xPolG <sup>mut</sup> 4 | 1204779               | 38                  | 3.15x10 <sup>-5</sup>  |
| 1xPolG <sup>mut</sup> 5      | 24762695              | 709                 | 2.86x10 <sup>-5</sup> | 1xPolG <sup>mut</sup> 5 | 2938793               | 118                 | 4.02x10 <sup>-5</sup> | 1xPolG <sup>mut</sup> 5 | 3081790               | 116                 | 3.76x10 <sup>-5</sup>  |
| 1xPolG <sup>mut-Chr2</sup> 1 | 52868988              | 1686                | 3.19x10 <sup>-5</sup> | 2xPolG <sup>mut</sup> 1 | 5462486               | 476                 | 8.71x10 <sup>-5</sup> | 2xPolG <sup>mut</sup> 1 | 2422131               | 267                 | 1.10x10 <sup>-4</sup>  |
| 1xPolG <sup>mut-Chr2</sup> 2 | 65209719              | 3052                | 4.68x10 <sup>-5</sup> | 2xPolG <sup>mut</sup> 2 | 6547279               | 872                 | 1.33x10 <sup>-4</sup> | 2xPolG <sup>mut</sup> 2 | 1896758               | 200                 | 1.05x10 <sup>-4</sup>  |
| 1xPolG <sup>mut-Chr2</sup> 3 | 70944805              | 1742                | 2.46x10 <sup>-5</sup> | 2xPolG <sup>mut</sup> 3 | 4274349               | 461                 | 1.08x10 <sup>-4</sup> | 2xPolG <sup>mut</sup> 3 | 3432156               | 496                 | 1.45x10 <sup>-4</sup>  |
| 1xPolG <sup>mut-Chr2</sup> 4 | 74409046              | 2094                | 2.81x10 <sup>-5</sup> | 2xPolG <sup>mut</sup> 4 | 7056676               | 690                 | 9.78x10 <sup>-5</sup> | 2xPolG <sup>mut</sup> 4 | 6967151               | 688                 | 9.87x10 <sup>-5</sup>  |
| 2xPolG <sup>mut</sup> 1      | 14409626              | 1427                | 9.90x10 <sup>-5</sup> | 2xPolG <sup>mut</sup> 5 | 7133239               | 654                 | 9.17x10 <sup>-5</sup> | 2xPolG <sup>mut</sup> 5 | 5222775               | 595                 | 1.14x10 <sup>-4</sup>  |
| 2xPolG <sup>mut</sup> 2      | 1951359               | 174                 | 8.92x10 <sup>-5</sup> |                         |                       |                     |                       |                         |                       |                     |                        |
| 2xPolG <sup>mut</sup> 3      | 14911301              | 1286                | 8.62x10 <sup>-5</sup> |                         |                       |                     |                       |                         |                       |                     |                        |
| 2xPolG <sup>mut</sup> 4      | 10731036              | 839                 | 7.82x10 <sup>-5</sup> |                         |                       |                     |                       |                         |                       |                     |                        |
